# Supplementary material for: Trophic relationships among Lujanian mammals 30 years later: brief review and the example of the Arroyo del Vizcaíno Local Fauna
Source: Research Square preprint supplement (doi:10.21203/rs.3.rs-7363866/v1), 2025-08-28
Supplement: Supplementary file 1 [file 25c79cf4080732899bd9c1bf.docx]

Supplementary material

Systematic Palaeontology

Xenarthra Cope 1889

Pilosa Flower 1883

Mylodontidae Gill 1872

*Lestodon armatus* Gervais 1855

*Glossotherium robustum* Owen 1842

*Mylodon darwinii* Owen 1840

*Valgipes bucklandi* Lund 1839

Nothrotheriidae Gaudin 1995

*Nothrotheriops* sp. Hayn 1919

Cingulata Illiger 1811

Glyptodontidae Gray 1869

*Glyptodon reticulatus* Owen 1845

*Doedicurus clavicaudatus* Owen 1847

*Panochthus tuberculatus* Owen 1845

Notoungulata Roth 1903

Toxodonta Owen 1853

Toxodontidae Gill 1872

*Toxodon platensis* Owen 1837

Proboscidea Illiger 1811

Elephantida (informal)

Gomphotheriidae Hay 1822

*Notiomastodon platensis* Ameghino 1888

Artiodactyla Owen 1848

Ruminantia Scopoli 1777

Cervidae Goldfuss 1820

Cervidae indet. sp. 1

Cervidae indet. sp. 2

Pecora Illiger 1811

Camelidae Gray 1821

Camelidae indet.

Perissodactyla Owen 1848

Hippomorpha Wood 1937

Equidae Gray 1821

*Hippidion principale*

*Equus (Amerhippus) neogeus*

Carnivora Bowdich 1821

Feloidea

Felidae Fischer von Waldheim 1817

*Smilodon populator* Lund 1842
